# Supplementary material for: Music therapy for supporting informal carers of adults with life-threatening illness pre- and post-bereavement; a mixed-methods systematic review
Source: PubMed Central journal article supplement (PMC10898157; doi:10.1186/s12904-024-01364-z), 2024-02-27
Supplement: 12904_2024_1364_MOESM2_ESM.pdf [file 12904_2024_1364_MOESM2_ESM.pdf]

## MusiCARER systematic review. Record of database searches up to July 2022

| Database                                                                                                                                                                 | Search date   | Database date range       | Number of records |
|--------------------------------------------------------------------------------------------------------------------------------------------------------------------------|---------------|---------------------------|-------------------|
| Cochrane Central Register of Controlled Trials (CENTRAL) via Cochrane Register of Studies Online ( <a href="https://crso.cochrane.org/">https://crso.cochrane.org/</a> ) | 15 April 2021 | Current issue             | <b>323</b>        |
| Cochrane Central Register of Controlled Trials (CENTRAL) via Cochrane Register of Studies Online ( <a href="https://crso.cochrane.org/">https://crso.cochrane.org/</a> ) | 19 July 2022  | Current issue             | <b>395</b>        |
| Ovid MEDLINE ALL                                                                                                                                                         | 15 April 2021 | 1946 to April 14, 2021    | <b>1299</b>       |
| Ovid MEDLINE ALL                                                                                                                                                         | 19 July 2022  | 1946 to July 18, 2022     | <b>1638</b>       |
| Embase (Ovid)                                                                                                                                                            | 15 April 2021 | 1974 to 2021 April 14     | <b>1741</b>       |
| Embase (Ovid)                                                                                                                                                            | 19 July 2022  | 1974 to 2022 July 18      | <b>2065</b>       |
| APA PsycINFO (Ovid)                                                                                                                                                      | 15 April 2021 | 1806 to April Week 1 2021 | <b>1198</b>       |
| APA PsycINFO (Ovid)                                                                                                                                                      | 19 July 2022  | 1806 to July Week 2 2022  | <b>1406</b>       |
| CINAHL Plus (EBSCOhost)                                                                                                                                                  | 15 April 2021 | 1939 onwards              | <b>1694</b>       |
| CINAHL Plus (EBSCOhost)                                                                                                                                                  | 19 July 2022  | 1939 onwards              | <b>1981</b>       |
| RILM Abstracts of Music Literature (EBSCOhost)                                                                                                                           | 15 April 2021 | Current issue             | <b>1097</b>       |
| RILM Abstracts of Music Literature (EBSCOhost)                                                                                                                           | 19 July 2022  | Current issue             | <b>963</b>        |
| <b>TOTAL RECORDS</b>                                                                                                                                                     |               |                           | <b>15,800</b>     |
